# Supplementary material for: Planning prompts to promote uptake of HIV services among men: a randomised trial in rural Uganda
Source: PubMed Central journal article supplement — BMJ Glob Health. 2020 Nov 30;5(11):e003390. doi: 10.1136/bmjgh-2020-003390 (PMC7705572; doi:10.1136/bmjgh-2020-003390), 2020-11-30
Supplement: bmjgh-2020-003390supp001.pdf [file bmjgh-2020-003390supp001.pdf]

**Planning Prompts to Promote Uptake of HIV Services among Men:  
A Randomized Trial in Rural Uganda  
Appendix**

**Appendix Table 1.** Effect of planning prompts on HIV testing uptake among all participants.

Main model by ordinary least squares regression with indicated adjustments. N = 2,361.

| Variable                             | Beta<br>(Std. Error) | P-Value     |
|--------------------------------------|----------------------|-------------|
| <b>Planning prompt</b>               | <b>0.025</b>         | <b>0.15</b> |
| <b>Reference: Control group</b>      | <b>(0.017)</b>       |             |
| Loss aversion arm                    | 0.021                | 0.47        |
| Reference: Fixed incentive arm       | (0.030)              |             |
| Lottery arm                          | 0.080                | 0.01        |
| Reference: Fixed incentive arm       | (0.030)              |             |
| High prize value                     | 0.059                | 0.05        |
| Reference: Low prize value           | (0.030)              |             |
| Age (years)                          | 0.004                | <0.01       |
|                                      | (0.001)              |             |
| Secondary education                  | -0.038               | 0.09        |
| Reference: Primary or less education | (0.023)              |             |
| More than secondary education        | 0.012                | 0.73        |
| Reference: Primary or less education | (0.034)              |             |
| Single                               | -0.052               | 0.03        |
| Reference: Married/cohabitating      | (0.023)              |             |
| Separated/divorced/widowed           | -0.035               | 0.33        |
| Reference: Married/cohabitating      | (0.036)              |             |
| Loss aversion arm*High prize value   | -0.008               | 0.84        |
|                                      | (0.042)              |             |
| Lottery arm*High prize value         | -0.100               | 0.02        |
|                                      | (0.042)              |             |
| Intercept                            | 0.557                | <0.01       |
|                                      | (0.037)              |             |

**Appendix Table 2.** Effect of planning prompts on HIV testing uptake among all participants.

Main models by binomial logistic regression. N = 2,362 (unadjusted) and 2,361 (adjusted).

| Variable                             | Unadjusted model<br>Odds ratio<br>(95% CI) | Adjusted Model<br>Odds ratio<br>(95% CI) |
|--------------------------------------|--------------------------------------------|------------------------------------------|
| <b>Planning prompt</b>               | <b>1.13</b>                                | <b>1.15</b>                              |
| <b>Reference: Control group</b>      | <b>(0.94–1.37)</b>                         | <b>(0.95–1.40)</b>                       |
| Loss aversion arm                    |                                            | 1.13                                     |
| Reference: Fixed incentive arm       |                                            | (0.82–1.55)                              |
| Lottery arm                          |                                            | 1.58                                     |
| Reference: Fixed incentive arm       |                                            | (1.13–2.22)                              |
| High prize value                     |                                            | 1.39                                     |
| Reference: Low prize value           |                                            | (1.01–1.93)                              |
| Age (years)                          |                                            | 1.03                                     |
|                                      |                                            | (1.02–1.04)                              |
| Secondary education                  |                                            | 0.82                                     |
| Reference: Primary or less education |                                            | (0.65–1.05)                              |
| More than secondary education        |                                            | 1.05                                     |
| Reference: Primary or less education |                                            | (0.72–1.56)                              |
| Single                               |                                            | 0.84                                     |
| Reference: Married/cohabitating      |                                            | (0.66–1.09)                              |
| Separated/divorced/widowed           |                                            | 0.81                                     |
| Reference: Married/cohabitating      |                                            | (0.54–1.25)                              |
| Loss aversion arm*High prize value   |                                            | 0.97                                     |
|                                      |                                            | (0.60–1.54)                              |
| Lottery arm*High prize value         |                                            | 0.56                                     |
|                                      |                                            | (0.35–0.91)                              |
| Intercept                            | 2.98                                       | 0.85                                     |
|                                      | (2.62–3.41)                                | (0.55–1.32)                              |

**Appendix Table 3.** Effect of planning prompts on HIV testing uptake within indicated subgroups. Each row presents the results of an ordinary least squares regression without adjustments.

|                                                       | N     | Beta<br>(Std. Error)           | P-value |
|-------------------------------------------------------|-------|--------------------------------|---------|
| <b>Subgroup: Enrolled ≤40 days before CHCs</b>        | 586   | <b>0.036</b><br><b>(0.033)</b> | 0.27    |
| <b>Subgroup: Enrolled &gt;40 days before CHCs</b>     | 1,775 | <b>0.018</b><br><b>(0.021)</b> | 0.39    |
| <b>Subgroup: Fixed incentive arm in parent trial</b>  | 799   | <b>0.027</b><br><b>(0.031)</b> | 0.38    |
| <b>Subgroup: Loss aversion arm in parent trial</b>    | 789   | <b>0.026</b><br><b>(0.030)</b> | 0.39    |
| <b>Subgroup: Lottery arm in parent trial</b>          | 774   | <b>0.014</b><br><b>(0.030)</b> | 0.63    |
| <b>Subgroup: Tested for HIV in past 12 months</b>     | 907   | <b>0.045</b><br><b>(0.029)</b> | 0.12    |
| <b>Subgroup: Not tested for HIV in past 12 months</b> | 1,066 | <b>0.018</b><br><b>(0.025)</b> | 0.46    |

Note: 389 participants were missing information on whether they had had an HIV test in the past 12 months. They have been excluded from the subgroup analyses in the last two rows.
